# Supplementary material for: Prediction of Thermodynamic Properties of Sacred Pepper (Piper auritum) Using Machine Learning
Source: Research Square preprint supplement (doi:10.21203/rs.3.rs-8546355/v1), 2026-01-09
Supplement: Supplementary file 2 [file cff944b47cf1ba1895799a59.docx]

| **Table S2**. Kinetic parameters for GAB model. | | | |
| --- | --- | --- | --- |
| **T (K)** | **M0** | **C** | **K** |
| 298.15 | 10.06548 | 15.01217 | 0.8169479 |
| 308.15 | 9.44834 | 7.625792 | 0.8203052 |
| 313.15 | 7.828976 | 7.313985 | 0.8717172 |
