# Supplementary material for: Prediction of Thermodynamic Properties of Sacred Pepper (Piper auritum) Using Machine Learning
Source: Research Square preprint supplement (doi:10.21203/rs.3.rs-8546355/v1), 2026-01-09
Supplement: Supplementary file 3 [file fce825f39520be7b505acf67.docx]

**Supporting Material**

**Prediction of Thermodynamic Properties of Sacred Pepper (*Piper auritum*) Using Machine Learning**

**Cesar Pérez-Alonso 1, José Alvarez-Ramirez 2, Reyna Natividad 3, Ever Peralta-Reyes 4, and Alejandro Regalado-Méndez 4, ***

1 Departamento de Ingeniería Química, Facultad de Química, Universidad Autónoma del Estado de México, Paseo Colón esq. Paseo Tollocan s/n, Col. Residencial Colón, C.P. 50120, Toluca, Estado de México, México.

2 Departamento de Ingeniería de Procesos e Hidráulica, Universidad Autónoma Metropolitana-Iztapalapa, Apartado Postal 55-535, Iztapalapa, CDMX 09340, Mexico

3 Chem. Eng. Lab., Joint Centre for Research on Sustainable Chemistry UAEM-UNAM, Faculty of Chemistry, Universidad Autónoma del Estado de México, Toluca 50200, Mexico

4 Research Laboratories, Universidad del Mar, Campus Puerto Ángel, Puerto Ángel, Oaxaca 70902, Mexico

*** Corresponding author:** alejandro_regalado@aulavirtual.umar.mx (A.R.-M.)

https://orcid.org/0000-0002-5270-745X

| **Table S1.** Experimental data. | | | | | | |
| --- | --- | --- | --- | --- | --- | --- |
|  | **Key parameters** | |  | **Responses** | | |
| **Ln (aw)** | **M**  **(kg H2O/100 kg s.s.)** | **T (K)** |  | **ΔH (kJ/mol)** | **ΔS (kJ/mol K)** | **ΔG (kJ/mol K)** |
| -4.72656874 | 1 | 298.15 |  | -48.4484638 | -0.123200251 | -11.71630888 |
| -3.9372344 | 2 | 298.15 |  | -48.4080403 | -0.129627196 | -9.759691831 |
| -3.4282616 | 3 | 298.15 |  | -48.0678535 | -0.132717804 | -8.498040342 |
| -3.02944484 | 4 | 298.15 |  | -47.2523668 | -0.13329841 | -7.509445733 |
| -2.68766942 | 5 | 298.15 |  | -45.746213 | -0.131088267 | -6.662246293 |
| -2.38056822 | 6 | 298.15 |  | -43.3724621 | -0.125679907 | -5.90099797 |
| -2.09853855 | 7 | 298.15 |  | -40.085931 | -0.117001622 | -5.201897434 |
| -1.83896736 | 8 | 298.15 |  | -36.0462064 | -0.105610394 | -4.558467418 |
| -1.60326789 | 9 | 298.15 |  | -31.602729 | -0.092666503 | -3.974211071 |
| -1.39483755 | 10 | 298.15 |  | -27.2139716 | -0.079679429 | -3.45754996 |
| -1.21482581 | 11 | 298.15 |  | -23.1998299 | -0.067712549 | -3.011333416 |
| -1.06214477 | 12 | 298.15 |  | -19.7262478 | -0.057331488 | -2.632864734 |
| -0.93381054 | 13 | 298.15 |  | -16.8168617 | -0.04864033 | -2.314747392 |
| -0.82606603 | 14 | 298.15 |  | -14.416127 | -0.041484014 | -2.047668262 |
| -0.73471465 | 15 | 298.15 |  | -12.4124851 | -0.035523261 | -1.821224715 |
| -0.65814601 | 16 | 298.15 |  | -10.8121324 | -0.030792244 | -1.631424891 |
| -0.59216984 | 17 | 298.15 |  | -9.45759178 | -0.026797618 | -1.467881912 |
| -0.53522554 | 18 | 298.15 |  | -8.32155967 | -0.023460783 | -1.326727292 |
| -0.48566344 | 19 | 298.15 |  | -7.35953354 | -0.020646191 | -1.203871806 |
| -0.44217978 | 20 | 298.15 |  | -6.53676308 | -0.018248128 | -1.096083674 |
| -0.40373956 | 21 | 298.15 |  | -5.8261261 | -0.016184232 | -1.000797336 |
| -0.36951537 | 22 | 298.15 |  | -5.20630197 | -0.014389872 | -0.915961754 |
| -0.33911561 | 23 | 298.15 |  | -4.67570619 | -0.012862988 | -0.840606252 |
| -0.3117037 | 24 | 298.15 |  | -4.20453539 | -0.011510576 | -0.772657096 |
| -0.28670695 | 25 | 298.15 |  | -3.77480203 | -0.010277066 | -0.71069467 |
| -0.26435926 | 26 | 298.15 |  | -3.41107609 | -0.009242922 | -0.655298784 |
| -0.2438086 | 27 | 298.15 |  | -3.07579725 | -0.00828925 | -0.604357407 |
| -0.22491886 | 28 | 298.15 |  | -2.76967573 | -0.007419563 | -0.557533161 |
| -0.20792734 | 29 | 298.15 |  | -2.51294861 | -0.006699763 | -0.515414269 |
| -0.19165942 | 30 | 298.15 |  | -2.24642689 | -0.005941096 | -0.475089037 |
| -0.17720098 | 31 | 298.15 |  | -2.03564485 | -0.005354337 | -0.439249174 |
| -0.16276825 | 32 | 298.15 |  | -1.78605471 | -0.004637202 | -0.403473037 |
| -0.15013388 | 33 | 298.15 |  | -1.60004899 | -0.004118377 | -0.372154739 |
| -0.13838167 | 34 | 298.15 |  | -1.43018574 | -0.003646361 | -0.343023139 |
| -0.12675812 | 35 | 298.15 |  | -1.23764161 | -0.003097203 | -0.314210445 |
| -3.99949716 | 1 | 308.15 |  | -48.4484638 | -0.123971818 | -10.24654814 |
| -3.22344919 | 2 | 308.15 |  | -48.4080403 | -0.130292699 | -8.258344997 |
| -2.73283289 | 3 | 308.15 |  | -48.0678535 | -0.133267718 | -7.001406084 |
| -2.35919348 | 4 | 308.15 |  | -47.2523668 | -0.133727761 | -6.04415721 |
| -2.05143381 | 5 | 308.15 |  | -45.746213 | -0.131398746 | -5.255689529 |
| -1.78862089 | 6 | 308.15 |  | -43.3724621 | -0.125880541 | -4.582373565 |
| -1.5611608 | 7 | 308.15 |  | -40.085931 | -0.117106282 | -3.999630129 |
| -1.36421015 | 8 | 308.15 |  | -36.0462064 | -0.105634126 | -3.495050596 |
| -1.19462974 | 9 | 308.15 |  | -31.602729 | -0.092624165 | -3.060592544 |
| -1.04956266 | 10 | 308.15 |  | -27.2139716 | -0.079587977 | -2.688936597 |
| -0.9259974 | 11 | 308.15 |  | -23.1998299 | -0.067588715 | -2.372367459 |
| -0.82085495 | 12 | 308.15 |  | -19.7262478 | -0.057190495 | -2.102996802 |
| -0.73120642 | 13 | 308.15 |  | -16.8168617 | -0.048494372 | -1.873320945 |
| -0.65444085 | 14 | 308.15 |  | -14.416127 | -0.041341802 | -1.676650696 |
| -0.58833289 | 15 | 308.15 |  | -12.4124851 | -0.035389259 | -1.507284811 |
| -0.53103831 | 16 | 308.15 |  | -10.8121324 | -0.030672186 | -1.360498435 |
| -0.48105222 | 17 | 308.15 |  | -9.45759178 | -0.026692052 | -1.232436107 |
| -0.43715572 | 18 | 308.15 |  | -8.32155967 | -0.023370387 | -1.119975065 |
| -0.3983624 | 19 | 308.15 |  | -7.35953354 | -0.020570973 | -1.020588187 |
| -0.36387334 | 20 | 308.15 |  | -6.53676308 | -0.018187683 | -0.932228616 |
| -0.33303837 | 21 | 308.15 |  | -5.8261261 | -0.016137905 | -0.853230689 |
| -0.30532579 | 22 | 308.15 |  | -5.20630197 | -0.014356871 | -0.782232187 |
| -0.28029811 | 23 | 308.15 |  | -4.67570619 | -0.012843076 | -0.71811229 |
| -0.25759312 | 24 | 308.15 |  | -4.20453539 | -0.011502815 | -0.659943026 |
| -0.236909 | 25 | 308.15 |  | -3.77480203 | -0.010280223 | -0.606951179 |
| -0.21799278 | 26 | 308.15 |  | -3.41107609 | -0.009257139 | -0.558488575 |
| -0.20063105 | 27 | 308.15 |  | -3.07579725 | -0.008313447 | -0.514008549 |
| -0.18464267 | 28 | 308.15 |  | -2.76967573 | -0.007452957 | -0.473046959 |
| -0.16987315 | 29 | 308.15 |  | -2.51294861 | -0.006742627 | -0.43520807 |
| -0.15618999 | 30 | 308.15 |  | -2.24642689 | -0.00599148 | -0.400152356 |
| -0.14347891 | 31 | 308.15 |  | -2.03564485 | -0.005413136 | -0.367587096 |
| -0.13164094 | 32 | 308.15 |  | -1.78605471 | -0.004701593 | -0.337258708 |
| -0.12058995 | 33 | 308.15 |  | -1.60004899 | -0.004189851 | -0.308946513 |
| -0.11025064 | 34 | 308.15 |  | -1.43018574 | -0.003724576 | -0.282457633 |
| -0.10055695 | 35 | 308.15 |  | -1.23764161 | -0.00318033 | -0.257622798 |
| -3.81526586 | 1 | 313.15 |  | -48.4484638 | -0.12299316 | -9.933155684 |
| -3.02328858 | 2 | 313.15 |  | -48.4080403 | -0.129448572 | -7.871219803 |
| -2.51715792 | 3 | 313.15 |  | -48.0678535 | -0.132570205 | -6.553493906 |
| -2.13020731 | 4 | 313.15 |  | -47.2523668 | -0.133183171 | -5.546056731 |
| -1.81369903 | 5 | 313.15 |  | -45.746213 | -0.131004933 | -4.722018215 |
| -1.54892171 | 6 | 313.15 |  | -43.3724621 | -0.125626056 | -4.032662757 |
| -1.32730218 | 7 | 313.15 |  | -40.085931 | -0.116973531 | -3.455669862 |
| -1.14318144 | 8 | 313.15 |  | -36.0462064 | -0.105604024 | -2.976306157 |
| -0.99121419 | 9 | 313.15 |  | -31.602729 | -0.092677867 | -2.580654976 |
| -0.86600605 | 10 | 313.15 |  | -27.2139716 | -0.079703975 | -2.254671947 |
| -0.76251763 | 11 | 313.15 |  | -23.1998299 | -0.067745787 | -1.985236846 |
| -0.67640569 | 12 | 313.15 |  | -19.7262478 | -0.057369331 | -1.761041896 |
| -0.60413177 | 13 | 313.15 |  | -16.8168617 | -0.048679505 | -1.572874631 |
| -0.54289967 | 14 | 313.15 |  | -14.416127 | -0.041522184 | -1.413455077 |
| -0.49053143 | 15 | 313.15 |  | -12.4124851 | -0.035559228 | -1.277112858 |
| -0.44533793 | 16 | 313.15 |  | -10.8121324 | -0.030824468 | -1.159450262 |
| -0.40600457 | 17 | 313.15 |  | -9.45759178 | -0.026825953 | -1.0570447 |
| -0.37150255 | 18 | 313.15 |  | -8.32155967 | -0.023485045 | -0.967217698 |
| -0.34102053 | 19 | 313.15 |  | -7.35953354 | -0.020666379 | -0.887856872 |
| -0.31391287 | 20 | 313.15 |  | -6.53676308 | -0.018264352 | -0.817281291 |
| -0.28966069 | 21 | 313.15 |  | -5.8261261 | -0.016196666 | -0.754140045 |
| -0.26784412 | 22 | 313.15 |  | -5.20630197 | -0.014398729 | -0.697339959 |
| -0.24812006 | 23 | 313.15 |  | -4.67570619 | -0.012868333 | -0.645987804 |
| -0.23020526 | 24 | 313.15 |  | -4.20453539 | -0.011512659 | -0.599346099 |
| -0.2138651 | 25 | 313.15 |  | -3.77480203 | -0.010276219 | -0.55680402 |
| -0.19890306 | 26 | 313.15 |  | -3.41107609 | -0.009239106 | -0.517849899 |
| -0.18515347 | 27 | 313.15 |  | -3.07579725 | -0.008282755 | -0.482052445 |
| -0.17247611 | 28 | 313.15 |  | -2.76967573 | -0.007410599 | -0.449046566 |
| -0.16075126 | 29 | 313.15 |  | -2.51294861 | -0.006688258 | -0.418520573 |
| -0.14987632 | 30 | 313.15 |  | -2.24642689 | -0.005927573 | -0.390207365 |
| -0.13976266 | 31 | 313.15 |  | -2.03564485 | -0.005338556 | -0.363876145 |
| -0.13033354 | 32 | 313.15 |  | -1.78605471 | -0.004619919 | -0.339327171 |
| -0.12152214 | 33 | 313.15 |  | -1.60004899 | -0.004099194 | -0.316386433 |
| -0.11326999 | 34 | 313.15 |  | -1.43018574 | -0.003625368 | -0.294901716 |
| -0.10552572 | 35 | 313.15 |  | -1.23764161 | -0.003074892 | -0.274739271 |

| **Table S2**. Kinetic parameters for GAB model. | | | |
| --- | --- | --- | --- |
| **T (K)** | **M0** | **C** | **K** |
| 298.15 | 10.06548 | 15.01217 | 0.8169479 |
| 308.15 | 9.44834 | 7.625792 | 0.8203052 |
| 313.15 | 7.828976 | 7.313985 | 0.8717172 |

| 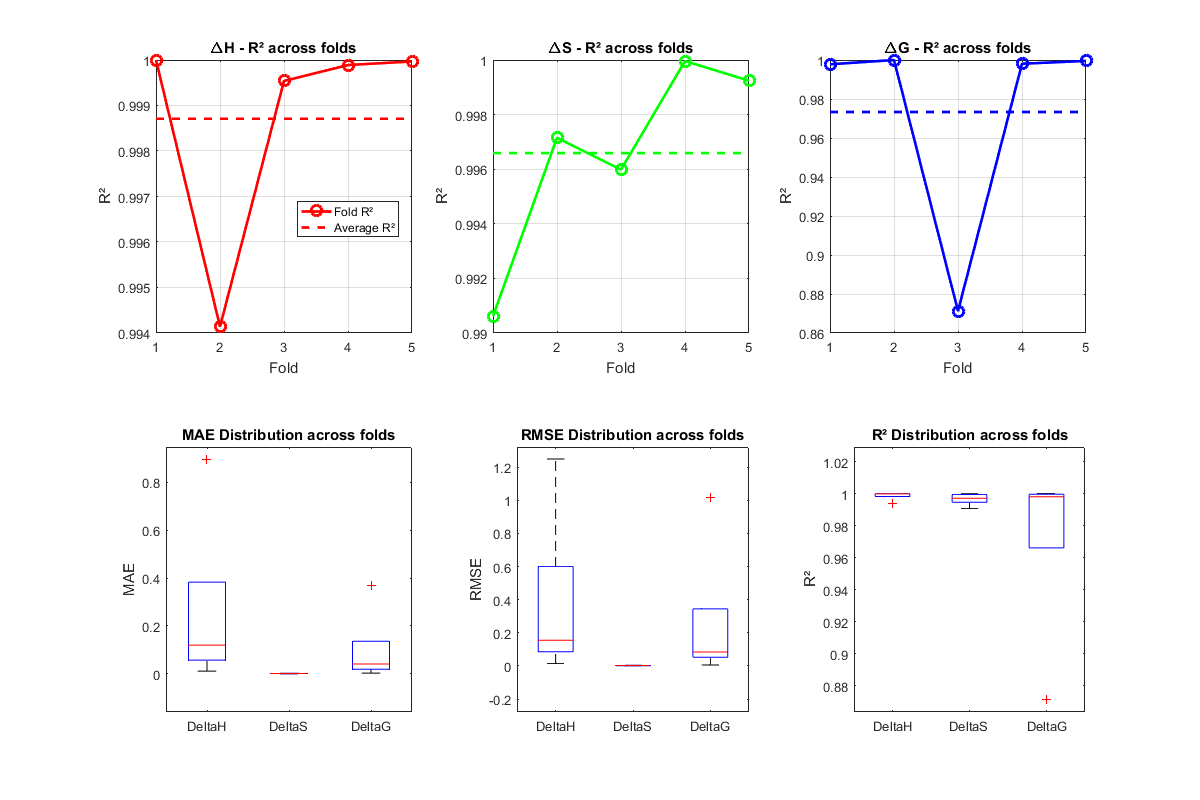 |
| --- |
| **Figure S1.** ANN model performance across 5-fold cross-validation for predicting thermodynamic properties (ΔH, ΔS, ΔG). |

| 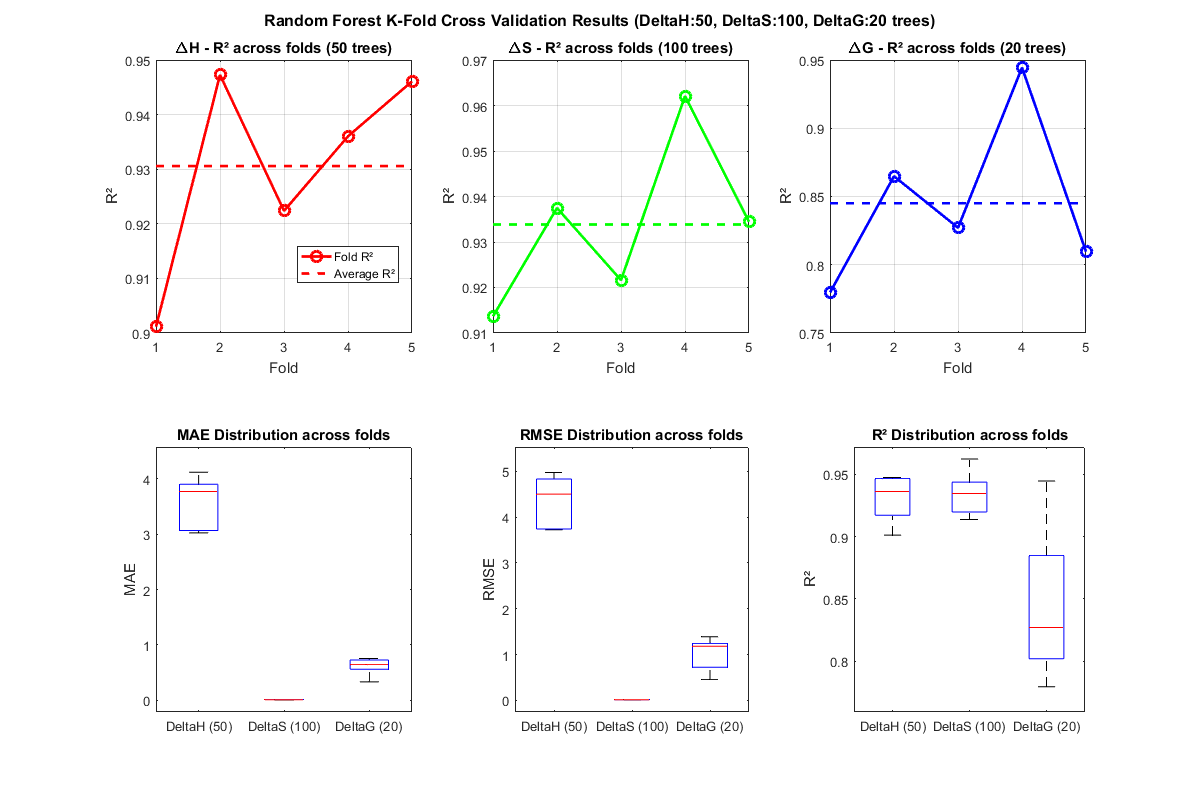 |
| --- |
| **Figure S2.** RF model performance across 5-fold cross-validation for predicting thermodynamic properties (ΔH, ΔS, ΔG). |

| 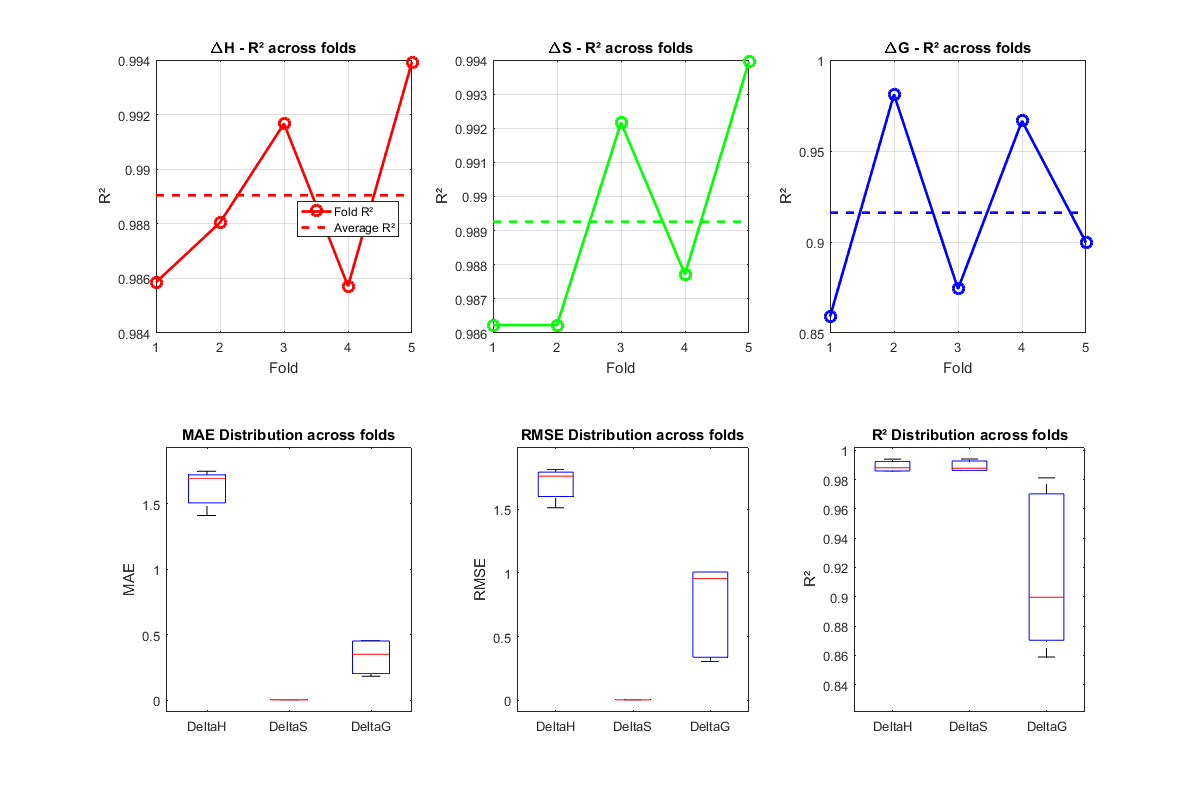 |
| --- |
| **Figure S3.** SVM model performance across 5-fold cross-validation for predicting thermodynamic properties (ΔH, ΔS, ΔG). |
